# Supplementary material
Source: Springer Nature journal article supplement (https://www.springermedizin.de/resource/supplementary/12936_2013_3240_MOESM2_ESM.pdf/9545428)

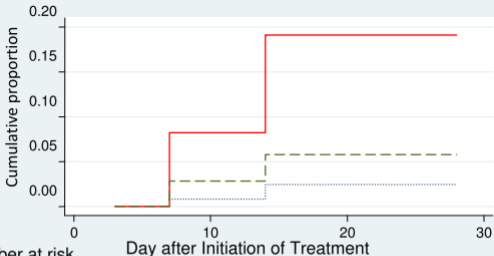

Number at risk

|         |     |     |     |   |
|---------|-----|-----|-----|---|
| Arm = 1 | 125 | 122 | 120 | 0 |
| Arm = 2 | 63  | 55  | 49  | 0 |
| Arm = 3 | 73  | 68  | 65  | 0 |

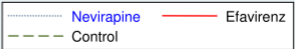

Supplement: MOESM2 [file 9545428]
